# Supplementary material for: Interaction between SCP3 and JAB1 Confers Cancer Therapeutic Resistance and Stem-like Properties through EGF Expression
Source: MDPI journal article supplement (doi:10.3390/ijms22168839), 2021-08-17
Supplement: s1 [file s1]

**Supplementary information for the manuscript entitled:**

**Interaction between SCP3 and JAB1 confers cancer therapeutic resistance  
and stem-like properties through EGF expression**

**Se Jin Oh et al.**

**Gating strategy of granzyme B-mediated cytotoxicity**

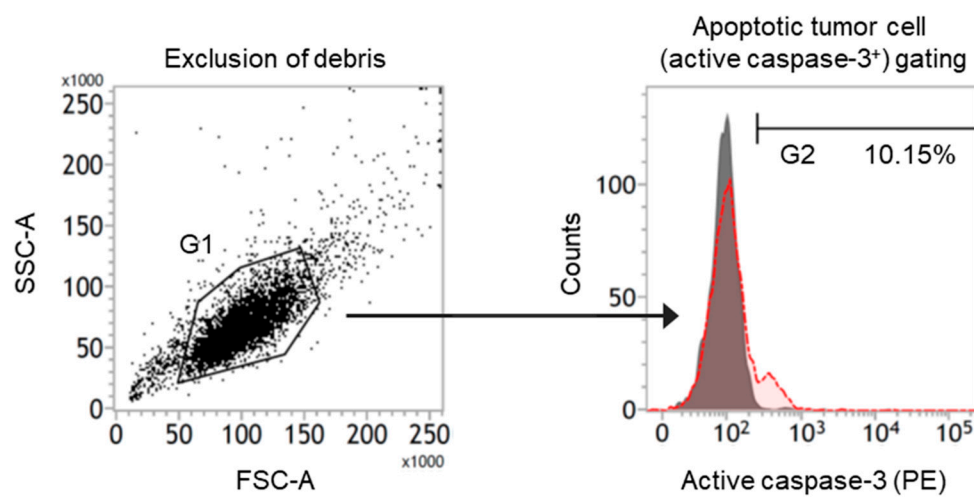

**Supplementary Figure S1** Gating strategy for identification of apoptotic tumor cells by granzyme B-mediated killing. Representative flow cytometry analysis showing the gating strategy. Population was initially gated on the basis of the forward side scatter characteristics and debris were eliminated. Finally, the active caspase-3<sup>+</sup> population was measured in the active caspase-3 (PE) histogram.
